# The Activity of Spontaneous Action Potentials in Developing Hair Cells Is Regulated by $\text{Ca}^{2+}$ -Dependence of a Transient $\text{K}^+$ Current

Snezana Levic<sup>1</sup>, Ping Lv<sup>1,2</sup>, Ebenezer N. Yamoah<sup>1\*</sup>

<sup>1</sup> Program in Communication Science, Department of Anesthesiology and Pain Medicine, School of Medicine, University of California Davis, Davis, California, <sup>2</sup> Department of Pharmacology, Hebei Medical University, Shijiazhuang, China

## Abstract

Spontaneous action potentials have been described in developing sensory systems. These rhythmic activities may have instructional roles for the functional development of synaptic connections. The importance of spontaneous action potentials in the developing auditory system is underpinned by the stark correlation between the time of auditory system functional maturity, and the cessation of spontaneous action potentials. A prominent  $\text{K}^+$  current that regulates patterning of action potentials is  $I_A$ . This current undergoes marked changes in expression during chicken hair cell development. Although the properties of  $I_A$  are not normally classified as  $\text{Ca}^{2+}$ -dependent, we demonstrate that throughout the development of chicken hair cells,  $I_A$  is greatly reduced by acute alterations of intracellular  $\text{Ca}^{2+}$ . As determinants of spike timing and firing frequency, intracellular  $\text{Ca}^{2+}$  buffers shift the activation and inactivation properties of the current to more positive potentials. Our findings provide evidence to demonstrate that the kinetics and functional expression of  $I_A$  are tightly regulated by intracellular  $\text{Ca}^{2+}$ . Such feedback mechanism between the functional expression of  $I_A$  and intracellular  $\text{Ca}^{2+}$  may shape the activity of spontaneous action potentials, thus potentially sculpting synaptic connections in an activity-dependent manner in the developing cochlea.

**Citation:** Levic S, Lv P, Yamoah EN (2011) The Activity of Spontaneous Action Potentials in Developing Hair Cells Is Regulated by  $\text{Ca}^{2+}$ -Dependence of a Transient  $\text{K}^+$  Current. PLoS ONE 6(12): e29005. doi:10.1371/journal.pone.0029005

**Editor:** Stuart E. Dryer, University of Houston, United States of America

**Received:** October 14, 2011; **Accepted:** November 18, 2011; **Published:** December 22, 2011

**Copyright:** © 2011 Levic et al. This is an open-access article distributed under the terms of the Creative Commons Attribution License, which permits unrestricted use, distribution, and reproduction in any medium, provided the original author and source are credited.

**Funding:** This work was supported by the National Institutes of Health (NIH) DC003826. The funders had no role in study design, data collection and analysis, decision to publish, or preparation of the manuscript.

**Competing Interests:** The authors have declared that no competing interests exist.

\* E-mail: enyamoah@ucdavis.edu

## Introduction

Structured spontaneous action potentials (SAPs) play an instructive role in the survival and refinement of neuronal connections in developing sensory systems [1–5]. Indeed, SAPs with different firing patterns encode information that may translate into variable gene expression that contributes to proper functional development [3,6–8]. Similarly, developing hair cells (HCs) fire SAPs before the onset of hearing [9–14], at a period when major synaptic refinement occurs within the cochlea and cochlear nucleus (CN) [9,13,15–17]. Before the onset of hearing, auditory neurons at various levels of the auditory pathway show low, bursting and occasional rhythmic spontaneous activity. This rhythmic activity is robust in the cochlear ganglion cells of the pre-hatched chickens [18,19], and the signal is abolished at higher levels by silencing the cochlea with the tetrodotoxin (TTX) injections or cochlear ablation [20]. Thus, SAPs may arise in the cochlea and it has been predicted that they may be modulated by the release of ATP from supporting cells and potentially contribute towards the establishment of proper tonotopic maps along auditory axes [21–23]. Incidentally, SAPs reappear during HC regeneration in chicken basilar papilla [9].

Spontaneous activity in developing HCs is  $\text{Ca}^{2+}$ -dependent [9,13,16,23], producing rhythmic changes in intracellular  $\text{Ca}^{2+}$  ( $\text{Ca}^{2+}_i$ ) [24,25]. Moreover, phasic alterations of  $\text{Ca}^{2+}_i$  mediate the

expression of  $\text{K}^+$  channels that modulate SAPs, or influence the gene expression that may refine neuronal connections [26–30]. 4-AP-sensitive currents, presumably of A-type  $\text{K}^+$  currents ( $I_A$ ) regulate spike timing and firing frequency in neurons [31–33] and cardiac myocytes [34]. The unique properties of the underlying channels include rapid, transient activation in the sub-threshold potentials, followed by fast inactivation. Although  $I_A$  is not known to be  $\text{Ca}^{2+}$ -sensitive, in neurons and myocytes, the kinetics and expression have been associated with changes in  $\text{Ca}^{2+}_i$  via channel protein interactions with  $\text{Ca}^{2+}$ -sensitive proteins [35–39]. The functional relevance of these changes in  $\text{Ca}^{2+}$  homeostasis and  $I_A$  expression are unknown but the correlation of the feedback between  $\text{Ca}^{2+}_i$  and  $\text{Ca}^{2+}$ -sensitive processes, such as the expression of  $I_A$ , can have important ramifications in  $\text{Ca}^{2+}$  oscillations and wave propagation in developing HCs [40–43].

In order to better understand the mechanisms of these spontaneously generated action potentials, we investigated the functional expression of  $I_A$  and its possible sensitivity to  $\text{Ca}^{2+}_i$  handling. Chelation of  $\text{Ca}^{2+}_i$  shifted the activation properties of the current to more positive potentials and reduced the expression of  $I_A$ . Our findings provided direct evidence to demonstrate that  $I_A$  is tightly regulated by  $\text{Ca}^{2+}_i$ , a feedback mechanism that may shape the patterning of SAPs and ultimately sculpt synaptic connections in the developing cochlea.

## Materials and Methods

### Isolation of the Chicken Basilar Papilla

The present investigation was approved in accordance with the guidelines of the Institutional Animal Care and Use Committee of University of California, Davis. The protocol number was 15544 under the institutional authorization code A3433-01. This study included chickens at different stages of embryonic development ranging from E6–E21 as well as post-hatched chickens. Fertilized eggs were incubated at 37°C in a Marsh automatic incubator (Lyon Electric). Before experiments, chicken embryos were killed and staged according to the following: from E8–E12: based on visceral arches, feather gems and eyelids; and after E12 based on the length of the beak [44]. Basilar papillae were isolated as described previously [9]. The preparations were dissected in

oxygenated chicken saline containing (in mM) 155 NaCl, 6 KCl, 4 CaCl<sub>2</sub>, 2 MgCl<sub>2</sub>, 5 Hepes, and 3 glucose, pH 7.4. The tegmentum vasculosum and the tectorial membrane were removed without any prior enzymatic treatment using a fine minutia needle. Chicken basilar papillae were stored in a 37°C incubator in Minimum Essential Medium (Invitrogen) before recording from HCs *in situ*. All experiments were performed at room temperature (21–23°C) within 5–45 mins of isolation. All reagents were obtained from Sigma Chemicals, unless specified otherwise.

### Electrophysiology

K<sup>+</sup> currents were recorded in a whole-cell voltage-clamp configuration, using 2–3 MΩ resistance pipettes. Currents were amplified with an Axopatch 200B amplifier (Molecular Devices, Union City, CA) and filtered at a frequency of 2–5 kHz through a

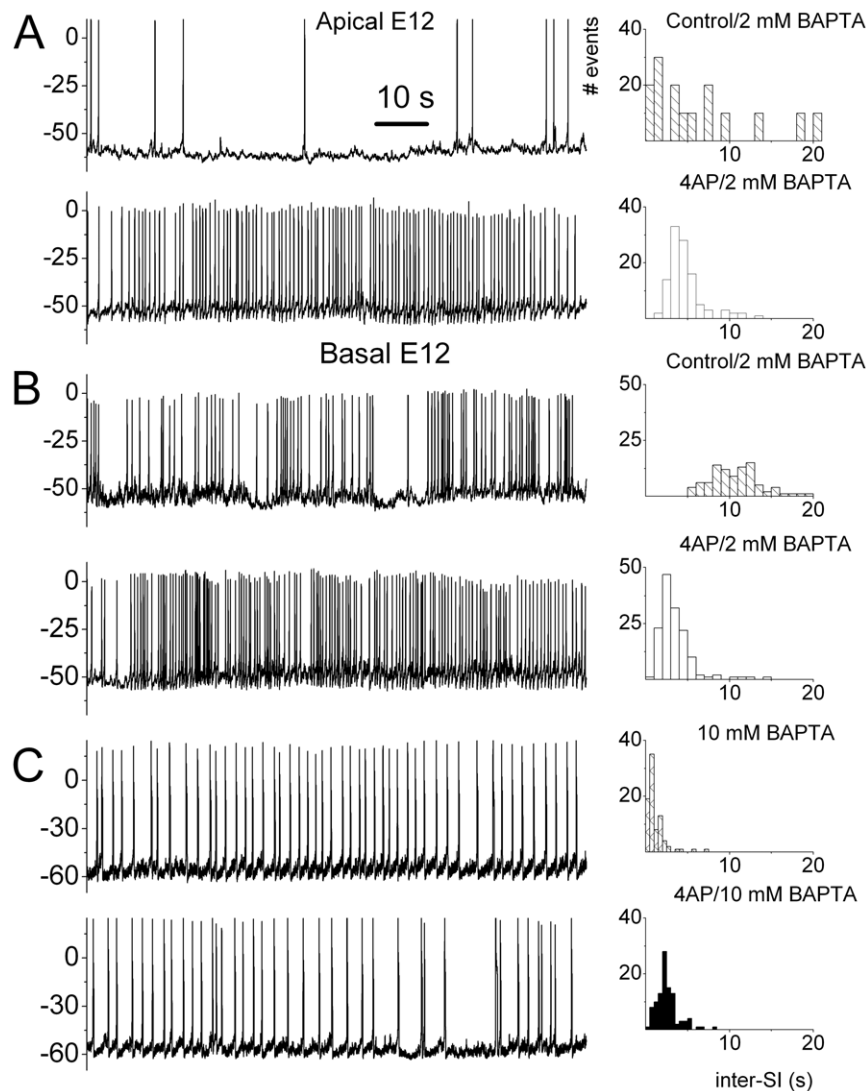

**Figure 1. The pattern of spontaneous electrical activity in developing HCs is altered by I<sub>A</sub> blocker and changes in Ca<sup>2+</sup>.** (A) Spontaneous electrical activity recorded from apical E12 HCs using 2-mM pipette BAPTA, for 80 s before (upper trace) and after (lower trace) application of 2.5 mM 4-AP. The interspike interval distribution histogram is shown beside (right) the recorded spontaneous action potentials (SAPs). (B) SAPs recorded from basal HCs at E12 using 2 mM BAPTA as in (A) for 80 s before (upper trace) and after (lower trace) bath application of 2.5 mM 4-AP. (C) SAPs recorded from a basal E12 HC using 10-mM pipette BAPTA for 80 s before (upper trace) and after (lower trace) addition of 2.5 mM 4-AP. Inhibition of the 4-AP-sensitive current promoted tonic firing. Moreover, the inhibitory effect of the 4-AP was attenuated using 10-mM pipette BAPTA. Thus, I<sub>A</sub> contributes towards the patterning of SAPs in developing HCs, and this effect may be Ca<sup>2+</sup>-dependent.  
doi:10.1371/journal.pone.0029005.g001

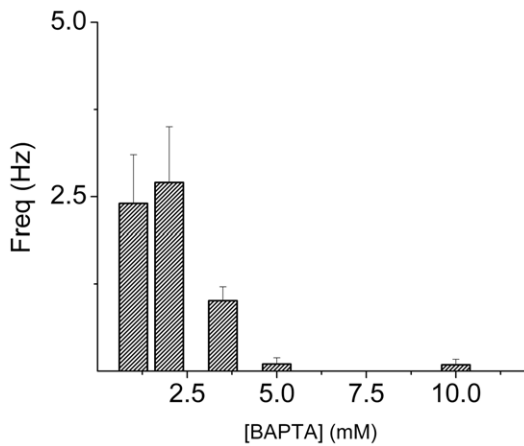

**Figure 2. Changes in firing frequency versus intracellular BAPTA.** Summary histogram illustrating the changes in firing frequency with changes in pipette BAPTA concentrations. On average, the firing frequency declined as the concentration of BAPTA was increased.

doi:10.1371/journal.pone.0029005.g002

low-pass Bessel filter. The data was digitized at 5–500 kHz using an analog-to-digital converter (Digidata 1200; Molecular Devices). The sampling frequency was determined by the protocols used. No online leak current subtraction was made, and only recordings with holding currents less than 50 pA were accepted for analyses. The liquid junction potentials were measured ( $3.5 \pm 0.9$  mV,  $n = 149$ ) and corrected online [45]. The capacitive transients were used to estimate the capacitance of the cell as an indirect measure of cell size. Membrane capacitance was calculated by dividing the area under the transient current in response to a voltage step as described [9]. The capacitive decay was fitted with a single exponential curve to determine the membrane time constant. Series resistance was estimated from the membrane time constant, given its capacitance. This study included  $\sim 703$  cells with a series resistance ( $R_s$ ) within a 5–15 M $\Omega$  range. After 60–90% compensation of the mean residual, uncompensated  $R_s$  was  $5.1 \pm 0.5$  M $\Omega$ . The seal resistance was typically 5–20 G $\Omega$ .

Action potentials were amplified (100 $\times$ ) with an Axopatch 200B amplifier (Axon Instruments) and filtered at 2–5 kHz through a low-pass Bessel filter. The data were digitized at 5–500 kHz using an analog-to-digital converter (Digidata 1200; Axon Instruments). The sampling frequency was determined by the protocols used. Action potentials were recorded using extracellular solution containing (in mM) NaCl 145, KCl 6, MgCl<sub>2</sub> 1, CaCl<sub>2</sub> 0–2, D-glucose 10, Hepes 10, pH 7.3. For whole-cell recordings of action potentials we used pipette solution containing (in mM): KCl 130,

Hepes 10, D-glucose, 5 KATP, 2–10, EGTA or BAPTA. Regarding perforated patch experiments, the tips of the pipettes were filled with the internal solution containing (in mM): KCl 150, Hepes 10, D-glucose 10, pH 7.3. The pipettes were front-filled with the internal solution and back-filled with the same solution containing 250- $\mu$ g/ml amphotericin. The stock solutions of all toxins were made either in ddH<sub>2</sub>O or DMSO and stored at  $-20^\circ\text{C}$ .

To record  $I_A$ , we eliminated  $\text{Ca}^{2+}$  from the bath and used 20 mM TEA and 300 nM apamin to block  $\text{K}^+$  currents, such as the delayed rectifier and  $\text{Ca}^{2+}$ -activated  $\text{K}^+$  currents ( $I_{\text{K}(\text{Ca})}$ ). Extracellular solution contained (in mM) NaCl 125, KCl 6, CaCl<sub>2</sub> 0, 20 TEA, D-glucose 10, MgCl<sub>2</sub> 1, HEPES 10, pH 7.3, 310 mOsm. Intracellular solution contained (in mM) KCl 120, Na<sub>2</sub>ATP 5, MgCl<sub>2</sub> 2, HEPES 10, EGTA 1–10, or BAPTA 1–10, D-glucose 10, pH 7.3, 300 mOsm.

### Data analysis

The number of cells ( $n$ ) is given for each data set. Data were analyzed using pClamp8 (Molecular Devices), Origin7.0 (OriginLab Corp. Northampton, MA) and Excel (Microsoft). Time constants ( $\tau$ s) were obtained from fits using Origin software. Time constants were obtained by fitting multiple exponential terms to the activation and decay of the current. The equation was of the form:

$$I = I_0 + A_1(\exp(-t/\tau_1) + A_2(\exp(-t/\tau_2) + A_n(\exp(-t/\tau_n))$$

Where  $I_0$  is the initial current magnitude,  $\tau_1, \tau_2, \dots, \tau_n$  are the time constants, and  $A_1, A_2, \dots, A_n$ , are the proportionality constants. Voltage-dependence of activation was examined from peak amplitude (measured at  $\sim 3$ –5 ms from the onset of voltage step) of tail currents at different developmental stages (embryonic, E) day-six to postnatal (P) day-two (E6-P2), then normalized steady-state curves were fitted with the Boltzmann distribution. Additionally, the steady-state inactivation curve was generated from normalized currents measured at a test potential following several conditioning pre-pulses. Pooled data were presented as mean  $\pm$  SD. Significant differences between groups were tested using the Student's  $t$  test, with  $p < 0.05$  or 0.01 indicating statistical differences.

### Results

#### Pharmacological elimination of $I_A$ profoundly alters the structure of SAPs in developing hair cells

To examine the roles of  $I_A$  on SAPs in developing HCs, we employed pharmacological strategies [9,46]. We applied 2.5 mM 4-AP, voltage-dependent  $\text{K}^+$ -current ( $I_A$ ) blocker, to spontaneously active HCs from the developing basilar papilla. Shown in Figures 1A and B are the effects of 4-AP on the patterning of SAPs. An

**Table 1.** Summary data on the effects of position and intracellular  $\text{Ca}^{2+}$  buffering on spike width, and rate of change of voltage of the depolarizing and repolarizing phase of spikes at E12.

|                   | Max left slope (dV/dt, V/s) |                | Max right slope (dV/dt, V/s) |               | Half width (ms) |                |
|-------------------|-----------------------------|----------------|------------------------------|---------------|-----------------|----------------|
|                   | Control                     | 4-AP           | Control                      | 4-AP          | Control         | 4-AP           |
| Apical 2 mM BAPTA | 6.9 $\pm$ 0.7               | 2.9 $\pm$ 1.9  | 6.4 $\pm$ 0.6                | 4.2 $\pm$ 1.8 | 6.3 $\pm$ 0.4   | 4.4 $\pm$ 1.5  |
| Basal 2 mM BAPTA  | 5.9 $\pm$ 0.3               | 5.9 $\pm$ 0.8  | 5.9 $\pm$ 0.2                | 5.8 $\pm$ 0.7 | 5.9 $\pm$ 0.2   | 4.2 $\pm$ 2.6  |
| Basal 10 mM BAPTA | 15.9 $\pm$ 1.2              | 15.6 $\pm$ 1.1 | 5.9 $\pm$ 0.7                | 5.9 $\pm$ 0.7 | 9.9 $\pm$ 1.5   | 10.1 $\pm$ 1.5 |

Increase in intracellular buffering significantly affected the spike width, and rate of change of voltage of the depolarizing and repolarizing phases of spikes. The data is expressed as mean  $\pm$  SD ( $n = 9$  cells for each experiment).

doi:10.1371/journal.pone.0029005.t001

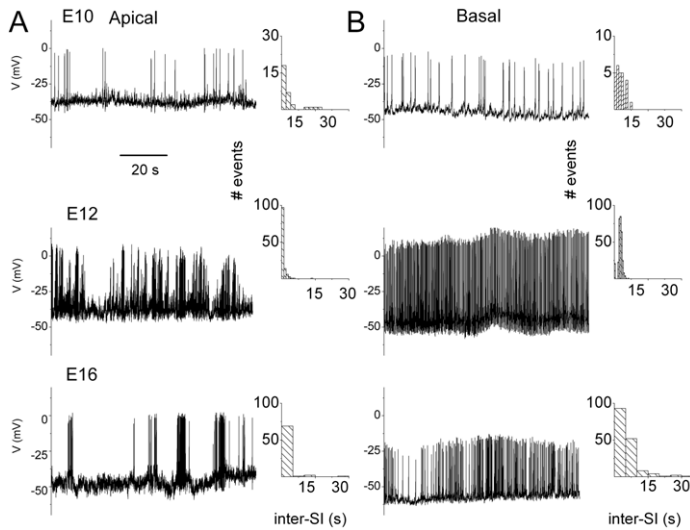

**Figure 3. Changes in the structure of spontaneous electrical activity in developing HCs.** Examples of the spontaneous activity recorded using perforated patch from apical (A) and basal (B) aspects of the developing chicken basilar papilla at E10, E12 and E16. The inter-spike interval distributions are shown.

doi:10.1371/journal.pone.0029005.g003

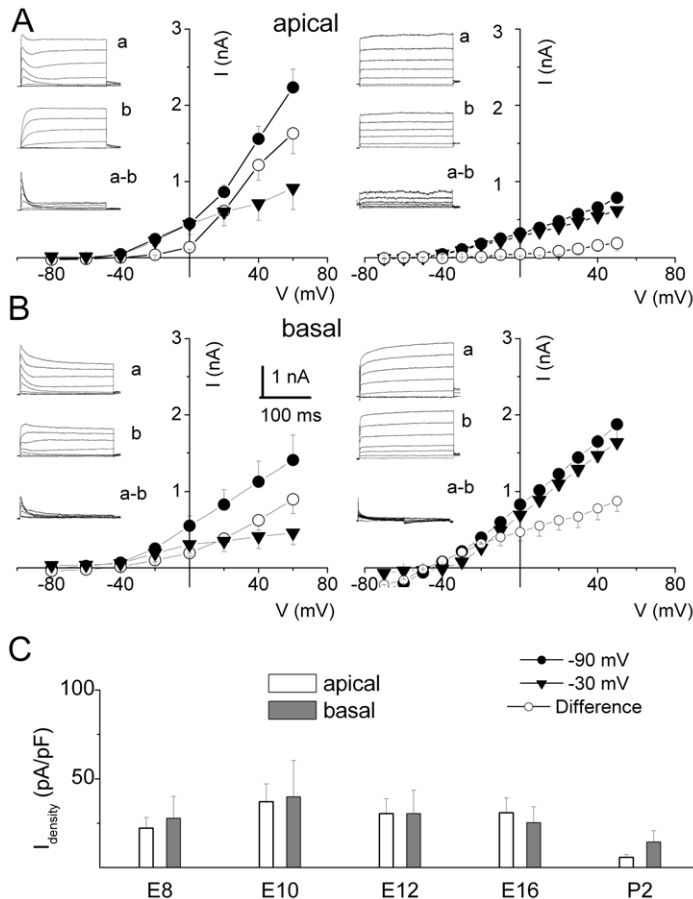

**Figure 4. The transient  $K^+$  currents displayed sensitivity towards holding potentials, and the magnitude changes during development.** (A–B) Examples of current traces recorded at E12 and P2 from HCs from apical and basal aspects of the basilar papilla. Current traces were elicited using 250-ms depolarizing voltage steps in 10-mV increments from  $-80$  to  $50$  mV. For clarity, traces are shown in 20 mV increments. The holding potentials were  $-90$  mV (a) and  $-30$  mV (b). The difference in current (a–b) is shown as well. (A–B) Plots of the mean current-voltage relationships are shown, corresponding to changes in the magnitude of the transient current at different developmental stages. (C) Mean difference current density at  $+0$  mV at apical and basal regions of the basilar papilla (pA/pF) at E8, E10, E12, E16, and P2. The holding potential-sensitive current density decreased during development. (E8,  $n=4$ ; E10,  $n=7$ ; E12,  $n=16$ ; E16,  $n=5$ ; P2,  $n=9$ ).

doi:10.1371/journal.pone.0029005.g004

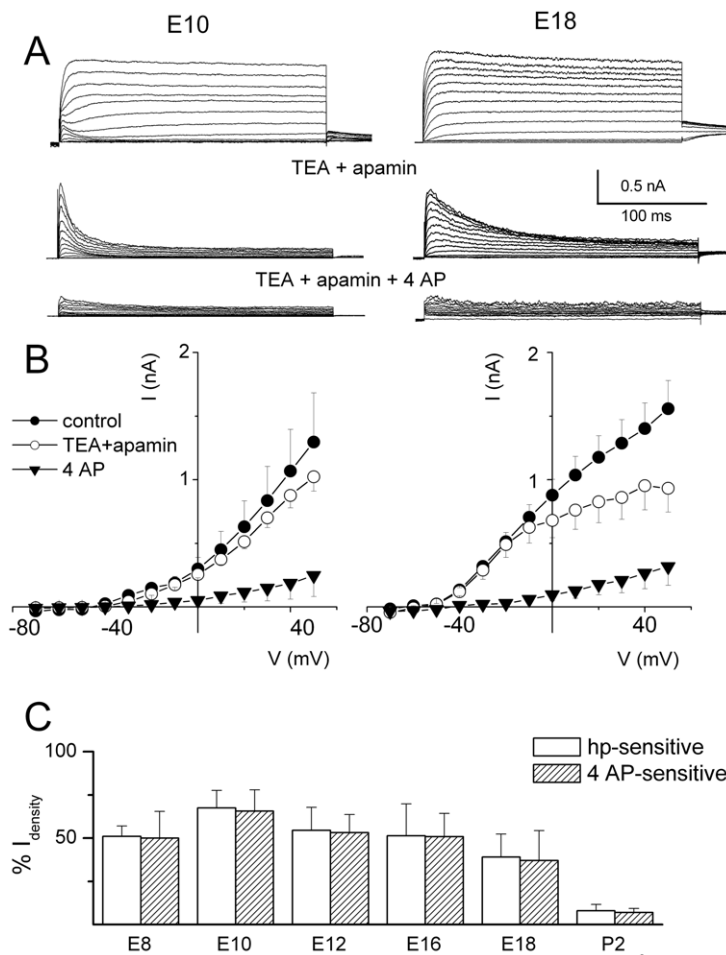

**Figure 5. Holding potential-sensitive  $K^+$  currents are sensitive to 4-AP.** (A) An example of whole cell current recorded from apical HCs at E12 and E18 showing TEA and 4-AP-sensitive components, using the protocol described in Figure 1. (B) Mean peak current-voltage relationships are plotted below the traces. (E12,  $n = 11$ ; E18,  $n = 5$ ). (C) Histogram showing the holding potential-sensitive currents was similar in magnitude to the 4-AP-sensitive currents. Additionally, the magnitude of the holding potential- and 4-AP-sensitive current decreased with maturation ( $n = 6$ ). doi:10.1371/journal.pone.0029005.g005

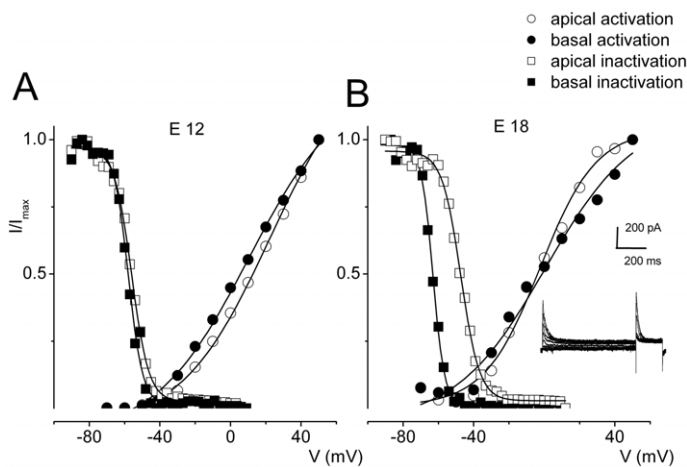

**Figure 6. Voltage dependence of activation and inactivation of  $I_A$  changes with maturation of HCs.** A–B The voltage-dependence of activation and inactivation of the transient current from HCs at apical and basal aspects of the basilar papilla at E12 and E18 were assessed. Steady-state inactivation properties of the transient current were determined by presenting pre-pulses of  $\sim 1$ -sec duration, at different membrane potentials ( $-90$  to  $-10$  mV), followed by a test pulse at 0 mV for 300 ms (see inset for examples of current traces). The Boltzmann function fits for steady-state activation and inactivation are plotted with solid lines. The half activation ( $V_{1/2}$ ) and inactivation voltages as well as slope factors are summarized in Tables 2, 3, 4. doi:10.1371/journal.pone.0029005.g006

**Table 2.** Summary data on the effects of development and tonotopic position of HC-A-current activation and inactivation ( $V_{1/2}$  (mV),  $k$  (mV)) with 2 mM BAPTA in pipette solution.

| Age | Activation |          |           |          | Inactivation |         |            |         |
|-----|------------|----------|-----------|----------|--------------|---------|------------|---------|
|     | Apical     |          | Basal     |          | Apical       |         | Basal      |         |
|     | $V_{1/2}$  | $k$      | $V_{1/2}$ | $k$      | $V_{1/2}$    | $k$     | $V_{1/2}$  | $k$     |
| E12 | 0.5±1.1    | 25.4±2.5 | -5.5±3.6  | 26.6±3.2 | -56.0±0.2    | 4.9±0.2 | -59.2±0.9; | 4.8±0.9 |
| E18 | -0.5±2.1   | 25.5±7.3 | -2.4±2.1  | 15.8±2.1 | -47.3±0.3    | 5.2±0.3 | -63.0±0.2; | 3.3±0.2 |

Although there is a small difference in voltage dependence of inactivation between apical and basal region of the papilla, this difference becomes significant at more mature stages ( $n=7$  cells).

doi:10.1371/journal.pone.0029005.t002

immediate observation is that 4-AP induces marked alterations in the frequency of AP firing, which is reflected in a patent reduction in the inter-spike intervals plotted on the right panels (Fig. 1). For example, 4-AP induced a 10-fold increase in AP firing in developing HCs at the apical aspects of the basilar papilla at E12 (pre-4-AP:  $0.11\pm0.05$  Hz; post-4-AP:  $1.1\pm0.2$  Hz,  $p<0.01$ ;  $n=7$ ). Similarly, basal HCs at E12 fire APs at the rate of  $\sim 0.5$  Hz ( $0.5\pm0.2$  Hz,  $n=9$ ). Moreover, after application of 4-AP, the frequency of firing increased to  $\sim 2$  Hz ( $2.1\pm0.6$  Hz,  $n=9$ ;  $p<0.05$ ). These experiments were performed using 2 mM BAPTA in the pipette solution to mimic physiological buffering capacity [47]. Spontaneous action potentials in developing HCs are  $Ca^{2+}$ -dependent [9], and to assess the role of intracellular  $Ca^{2+}$  ( $Ca^{2+}_i$ ) in 4-AP-mediated changes in AP firing rates, we used 10 mM pipette-BAPTA. Surprisingly, the typical phasic and burst pattern seen in E12 apical HCs (Fig. 1A) was replaced with tonic AP firing in the presence of 10 mM BAPTA (Fig. 1C). Even more startlingly was the resulting lack of 4-AP-mediated changes in the presence of 10 mM BAPTA. Changes in frequency of firing *versus* pipette-BAPTA concentrations are shown (Fig. 2). The correlation between 4-AP-mediated effects and high concentrations of BAPTA suggests that the 4-AP-sensitive current ( $I_A$ ) may be sensitive to  $Ca^{2+}_i$  availability. Additionally, the data hinted that  $I_A$  regulates the firing pattern of developing HCs in a  $Ca^{2+}_i$ -dependent manner. The effects of BAPTA and 4-AP on individual action potentials are outlined in Table 1.

The structure of SAPs in developing HCs not only differs between apical and basal cells, but also varies at different developmental stages as shown in figure 3. Along the tonotopic axes, the general trend varied from phasic bursting apical cells to tonic bursting basal cells (Fig. 3). Thus, we reasoned that different kinetics and the magnitude of  $I_A$  during development, and tonotopic expression of the current could, in part, be responsible for diverse spiking activity (Fig. 3).

### $I_A$ is expressed at the earliest stages of HC development

Previous studies have shown that  $K_v4.2$  and  $K_v1.x$  channels are the presumptive channels that generate  $I_A$  in chicken HCs. These channels were expressed, at the level of mRNA, at the earliest stages of development [48]{Sokolowski, 2004 #192, [49]}. However, functional studies in mature HCs showed that the current was limited to basal HCs [50,51]. We determined the functional expression and kinetics of  $I_A$  in HCs with respect to developmental age and position along the tonotopic axis. Figure 4 shows examples of whole-cell current profiles and current-voltage relations in HCs at the apical (Fig. 4A) and basal (Fig. 4B) aspects of the basilar papilla elicited from different holding potentials at E8-P2 (Fig. 4C; summary data). The transient component of the current was remarkably sensitive to holding voltages throughout development. The difference-current between current traces generated at a holding potential of  $-90$  and  $-30$  mV was the main transient component. The magnitude of the transient current plummeted as HCs matured (Fig. 4C), and the transient outward current was virtually absent in mature apical HCs. To ensure that the transient current was indeed  $I_A$ , we examined the sensitivity of the current to 4-AP [50,51]. A sizable portion ( $\sim 50\%$  at E10) of the sustained component of the outward  $K^+$  current elicited from a holding potential of  $-90$  mV was suppressed upon application of 20 mM TEA and 300 nM apamin in the bath, revealing a fast inactivating current that was sensitive to 2.5 mM 4-AP (Fig. 5A). Figure 5B illustrates the current-voltage relations at E10 and E18, and figure 5C shows the summary data, revealing a striking agreement between the magnitudes of the 4-AP- and holding potential-sensitive currents across different developmental stages of basal HCs. The result is in keeping with molecular biological evidence showing the expression of  $K_v4.2$  channels in developing HCs [48].

**Table 3.** Voltage dependence of activation ( $V_{1/2}$  (mV),  $k$  (mV)).

| Age | 1 mM BAPTA |          | 2 mM BAPTA |          | 5 mM BAPTA |          | 10 mM BAPTA |          | 5 mM EGTA |          | 10 mM EGTA |          |
|-----|------------|----------|------------|----------|------------|----------|-------------|----------|-----------|----------|------------|----------|
|     | $V_{1/2}$  | $k$      | $V_{1/2}$  | $k$      | $V_{1/2}$  | $k$      | $V_{1/2}$   | $k$      | $V_{1/2}$ | $k$      | $V_{1/2}$  | $k$      |
| E12 | 0.6±1.9    | 22.8±1.4 | 0.5±1.1    | 25.4±2.5 | 8.9±2.6    | 25.1±1.8 | 23.1±5.7    | 24.5±1.9 | -0.8±0.4  | 16.3±2.5 | 23.3±4.3   | 25.3±2.6 |
| E18 | -3±0.9     | 22.1±0.9 | -10.1±0.8  | 16.9±0.9 | 7.1±1.4    | 22.9±1.0 | 6.5±0.7     | 20.9±0.6 | -         | -        | -          | -        |

The table compares the voltage dependence of the steady state activation at different stages of development and intracellular  $Ca^{2+}$  buffering. Increased buffering shifts the activation to more positive potentials ( $n=8$  cells).

doi:10.1371/journal.pone.0029005.t003

**Table 4.** Voltage dependence of inactivation ( $V_{1/2}$  (mV),  $k$  (mV)).

| Age | 1 mM BAPTA      |                | 2 mM BAPTA        |                   | 5 mM BAPTA      |                   | 10 mM BAPTA     |                   |
|-----|-----------------|----------------|-------------------|-------------------|-----------------|-------------------|-----------------|-------------------|
|     | $V_{1/2}$       | $k$            | $V_{1/2}$         | $k$               | $V_{1/2}$       | $k$               | $V_{1/2}$       | $k$               |
| E12 | $-50.1 \pm 2.0$ | $0.50 \pm 0.1$ | $-56.1 \pm 0.2$   | $4.8 \pm 0.2$ (a) | $-52.3 \pm 0.2$ | $3.9 \pm 0.2$     | $-48.4 \pm 0.5$ | $2.6 \pm 0.7$ (a) |
|     | $-57.5 \pm 0.3$ | $4.3 \pm 0.3$  | $-59.2 \pm 0.9$   | $8.1 \pm 0.9$ (b) |                 |                   | $-55.6 \pm 0.7$ | $9.2 \pm 0.6$ (b) |
| E16 | -               |                | $-59.1 \pm 2.1$   | $4.1 \pm 2.2$     | $-57.1 \pm 0.1$ | $3.3 \pm 0.1$     | $-52.5 \pm 0.7$ | $2.2 \pm 0.5$ (a) |
|     |                 |                |                   |                   |                 |                   | $53.4 \pm 8.1$  | $1.5 \pm 3.5$ (b) |
| E18 | -               |                | $-55.7 \pm 0.3$ ; | $4.2 \pm 0.3$ (a) | $-46.2 \pm 0.7$ | $3.3 \pm 0.4$ (a) | $-48.9 \pm 1.4$ | $1.6 \pm 1.2$ (a) |
|     |                 |                | $-63.1 \pm 0.2$   | $3.4 \pm 0.2$ (b) |                 |                   | $-47.4 \pm 0.4$ | $5.2 \pm 0.4$ (b) |

The table illustrates a comparison of voltage dependence of steady-state inactivation at different stages of development and the concentrations of intracellular  $Ca^{2+}$  buffer. Increased buffering shifts the activation to more positive potential (a = apical, b = basal hair cells;  $n = 7$ ).  
doi:10.1371/journal.pone.0029005.t004

### Changes in voltage-dependent activation and inactivation of $I_A$ during development

The voltage-dependence of the activation and inactivation of  $I_A$  varied with age (Figure 6, Tables 2, 3, 4). Differences in voltage-dependent properties of  $I_A$  between apical and basal HCs were stark at E18 compared to E12 (Fig. 6B). At E12, the  $V_{1/2}$  of the activation curve was  $\sim 0.5$  mV for apical and  $\sim -5.5$  mV for basal cells. The half-activation voltage ( $V_{1/2}$ ) of inactivation was  $\sim -56$  mV for apical and  $\sim -59$  mV for basal cells. By E18, the transient outward current in basal HCs inactivated at more negative potentials than apical HCs (Figure 5B; Table 2). At E18, the  $V_{1/2}$  of inactivation was  $\sim -47$  mV for apical and  $-63$  mV for basal cells. Consistent with previous reports, the data suggest that as HCs mature,  $I_A$  is mainly confined to cells at the basal aspects of the cochlea [50–52].

### Changes in $Ca^{2+}_i$ buffering have a profound effect on $I_A$

To examine the underlying mechanisms for the BAPTA-induced 4-AP-insensitivity to SAPs described in figure 1, we tested  $I_A$  sensitivity to acute changes in  $Ca^{2+}$  chelators. We used BAPTA-AM, a selective  $Ca^{2+}$  chelator that is the cell-permeable analog of BAPTA. Application of 5 mM BAPTA-AM to basal HCs produced a marked reduction of the transient  $K^+$  current (Fig. 7A). Moreover, raising the external  $Ca^{2+}$  from 0 to 2 mM had no effect on the transient current (Fig. 7B), hinting that  $Ca^{2+}$  entry via  $Ca^{2+}$  channels may not be sufficient to affect  $I_A$ . Rather, the release of  $Ca^{2+}_i$  may be the  $Ca^{2+}$  source to alter  $I_A$ . We probed the  $Ca^{2+}$ -dependence of  $I_A$  further by examining the voltage- and time-dependent properties of the current using varying concentrations of BAPTA (Tables 3, 4, 5). Figure 8 illustrates the effects of 2 and 10 mM intracellular BAPTA on  $I_A$  in an apical E12 HC. Reducing the available  $Ca^{2+}_i$  by using 10 mM pipette BAPTA produced a significant shift in the voltage-sensitivity of activation. The  $V_{1/2}$ s of the steady-state activation were (in mV)  $\sim 0$  and 23 using (in mM) 2 and 10 BAPTA, respectively. Moreover the  $V_{1/2}$ s of the steady-state inactivation were  $\sim -56$  mV and  $-48$  mV using (in mM) 2 and 10 BAPTA, respectively. Additionally, we examined the time-dependence of the development of inactivation after varying durations at  $-50$  mV and  $-90$  mV. The time constants of inactivation ( $\tau_i$ ) were compared at different stages of development and with respect to different concentrations of  $Ca^{2+}_i$  buffer (Table 5). At all developmental stages tested (E12–E18), the kinetics of decay of the current were fitted with two  $\tau$ s. As shown in figure 9, the use of different concentrations of BAPTA had a marked effect on the amplitude and inactivation kinetics of  $I_A$ . For example, for an apical E12 HC, the amplitude of the current measured at  $+40$  mV was  $\sim 825$  pA in 2 mM BAPTA and

$\sim 405$  pA in 10 mM BAPTA. Moreover, inactivation time constants ( $\tau_i$ s) of  $I_A$  were  $\sim 5$  ms and 75 ms, using 2 mM BAPTA. Using 10 mM BAPTA the  $\tau$ s were  $\sim 75$  ms and 300 ms (Fig. 9A).

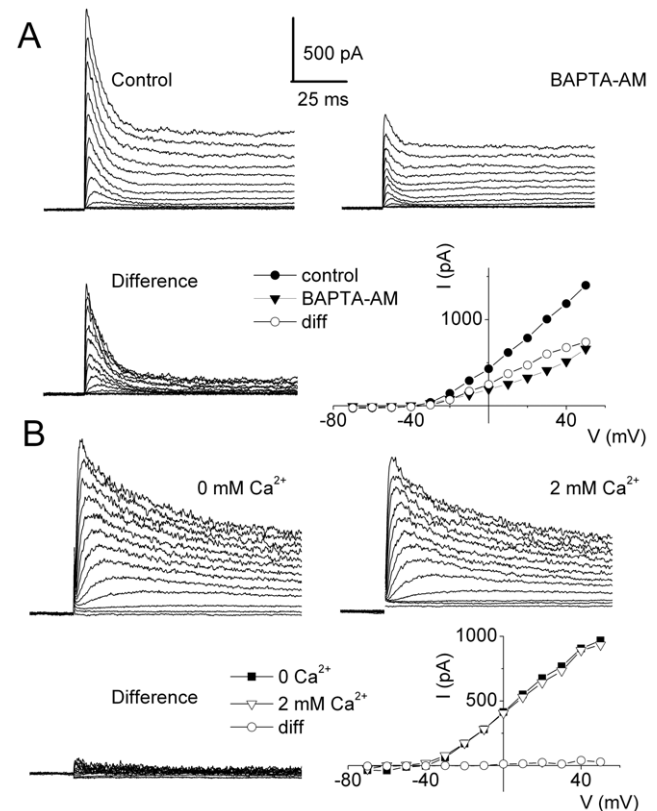

**Figure 7.  $I_A$  is sensitive to  $Ca^{2+}_i$  buffering.** (A) Examples of current traces recorded from different apical HCs at E14 using 1 mM pipette BAPTA in the presence of 20 mM TEA and 200 nM apamin in the bath solution before and 30 mins after application of bath solution containing 5 mM BAPTA-AM. The difference-current traces are shown. An increase in  $Ca^{2+}_i$  buffering altered the transient  $K^+$  current. The current-voltage relationship is shown. (B) Examples of currents recorded from apical HCs at E14 in the presence of 20 mM TEA and 200 nM apamin before and after application of a bath solution containing 2 mM  $Ca^{2+}$ , as well as the difference current. The currents were elicited with the same protocol as described in Figure 1. The plot shows the current-voltage relationship.  
doi:10.1371/journal.pone.0029005.g007

**Table 5.** Comparison of the time constants ( $\tau$ ) of decay at different stages of development and with respect to different concentrations of  $\text{Ca}^{2+}_i$  buffer.

| Age | 2 mM BAPTA |          | 10 mM BAPTA |          |
|-----|------------|----------|-------------|----------|
|     | $\tau$     | $\tau_2$ | $\tau_1$    | $\tau_2$ |
| E12 | 5          | 75       | 60          | 298      |
| E16 | 30         | 250      | 40          | 230      |
| E18 | 50         | 600      | 50          | 700      |

At all developmental stages tested (E12–E18), the kinetics of decay of the current were fitted with two time constants.  
doi:10.1371/journal.pone.0029005.t005

Similarly, the time dependence of development and recovery from inactivation were duly affected (Figs. 9B–D). Whereas the current shows complete inactivation within  $\sim 75$  ms, using 2 mM BAPTA, the time constant of inactivation was prolonged by  $\sim 4$ -fold ( $\sim 300$  ms) in the presence of 10 mM BAPTA (Figure 9C). Meanwhile, the current recovered from inactivation with a time constant of  $\sim 450$  ms in 2 mM BAPTA and  $\sim 1200$  ms in 10 mM BAPTA (Fig. 9D). The results clearly suggest that the 4-AP-sensitive current is regulated tightly by  $\text{Ca}^{2+}_i$ .

## Discussion

The transient outward  $\text{K}^+$  current ( $I_A$ ) in the developing chicken HC was identified functionally by Murrow (1994) and Griguer and

Fuchs (1996) [51,53] and the molecular characteristics were revealed later [48] {Rajeevan, 1999 #193, [52]}. Moreover, the short and long-term modulation of  $I_A$  in developing chicken HC is unknown, despite the currents purported role in spike timing in SAPs. Also important, roles of  $I_A$  and its regulation and the ensuing effects on the structure of SAPs in developing HCs are unclear. This study fills in major gaps in our understanding of the patterning of SAPs in HCs. Our findings include; 1)  $I_A$  contributes towards the patterning of SAPs. Since the current dictates the spike timing and firing pattern, it is conceivable to suggest that it may regulate the release of neurotransmitters in the developing cochlea to sculpt synapse formation. 2) Expression of  $I_A$  is regulated developmentally and tonotopically. At the apical aspects of the basilar papilla the expression of  $I_A$  is prominent only in early development. By contrast,  $I_A$  persists in HCs at the basal aspects of the matured basilar papilla. 3) Alterations of  $\text{Ca}^{2+}_i$  by  $\text{Ca}^{2+}$  buffers produced marked effects on the functional expression, voltage-dependence and kinetics of  $I_A$ . Increased concentrations of the  $\text{Ca}^{2+}_i$  buffer, BAPTA shifted the voltage-dependence of activation and inactivation to more positive potentials and reduced the number of functional channels expressed. These findings reaffirm the tight interplay that occurs between  $\text{Ca}^{2+}_i$  and  $\text{K}^+$  currents.

Suppression of  $I_A$  visibly alters spike timing and frequency, transforming phasic action potential burst into tonic firing in spontaneously active chicken HCs. The results are reminiscent of the effects of a transient outward current in the developing mouse HC [16]. However, after increased  $\text{Ca}^{2+}$  buffer, not only did the phasic patterning of spikes appear tonic, but also suppression of  $I_A$  had no effect on the firing pattern, raising the possibility that reduced  $\text{Ca}^{2+}_i$  could stifle the availability of  $I_A$ . The deduced amino acid sequence of the  $\alpha$ -subunits of  $\text{K}_v1.2$ ,  $\text{K}_v1.3$  and  $\text{K}_v1.5$  and the

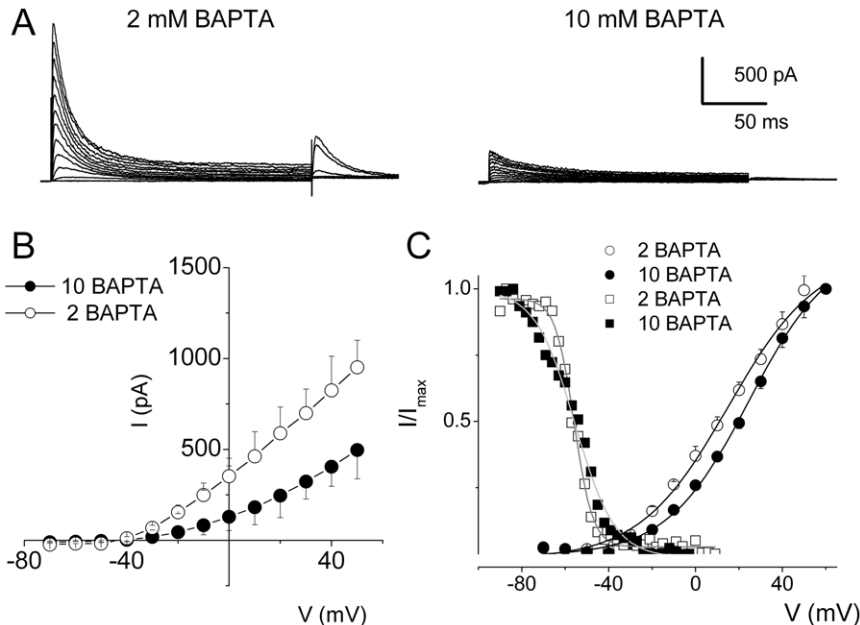

**Figure 8. The voltage-dependent activation and inactivation of  $I_A$  and availability of  $\text{Ca}^{2+}_i$ .** (A) Current traces recorded from apical HCs at E12 using pipette BAPTA concentrations, 2 (left panel) and 10 mM (right panel) BAPTA. (B) Mean current-voltage relationship for data obtained for the two conditions (2 and 10 mM pipette BAPTA;  $n=9$ ). (C) The voltage-dependence of activation and inactivation of the transient  $\text{K}^+$  current from E12 apical HCs using 2 and 10 mM pipette BAPTA. Steady state inactivation properties of the transient current were determined using the protocol described in Figure 6. Steady-state activation and inactivation of the currents were determined as in Figure 6. The Boltzmann function fits are shown in solid lines. Half-activation voltages were (in mV)  $0.5 \pm 1.1$  and  $33.1 \pm 5.7$  for 2, and 10 mM BAPTA, respectively. The maximum slope factors ( $k$ ) were (in mV):  $25.4 \pm 2.5$  and  $24.5 \pm 1.9$  ( $n=9$  cells) for 2 and 10 mM BAPTA, respectively. The half-inactivation voltages were (in mV)  $-56.1 \pm 0.2$  and  $-48.4 \pm 0.5$  for 2, and 10 mM BAPTA, respectively. The maximum slope factors ( $k$ ) were  $4.8 \pm 0.2$  and  $2.6 \pm 0.7$  ( $n=9$  cells) for 2, and 10 mM BAPTA, respectively. Notice the currents' activation and inactivation is shifted to more positive potentials with increased  $\text{Ca}^{2+}$  buffering (see Tables 4).  
doi:10.1371/journal.pone.0029005.g008



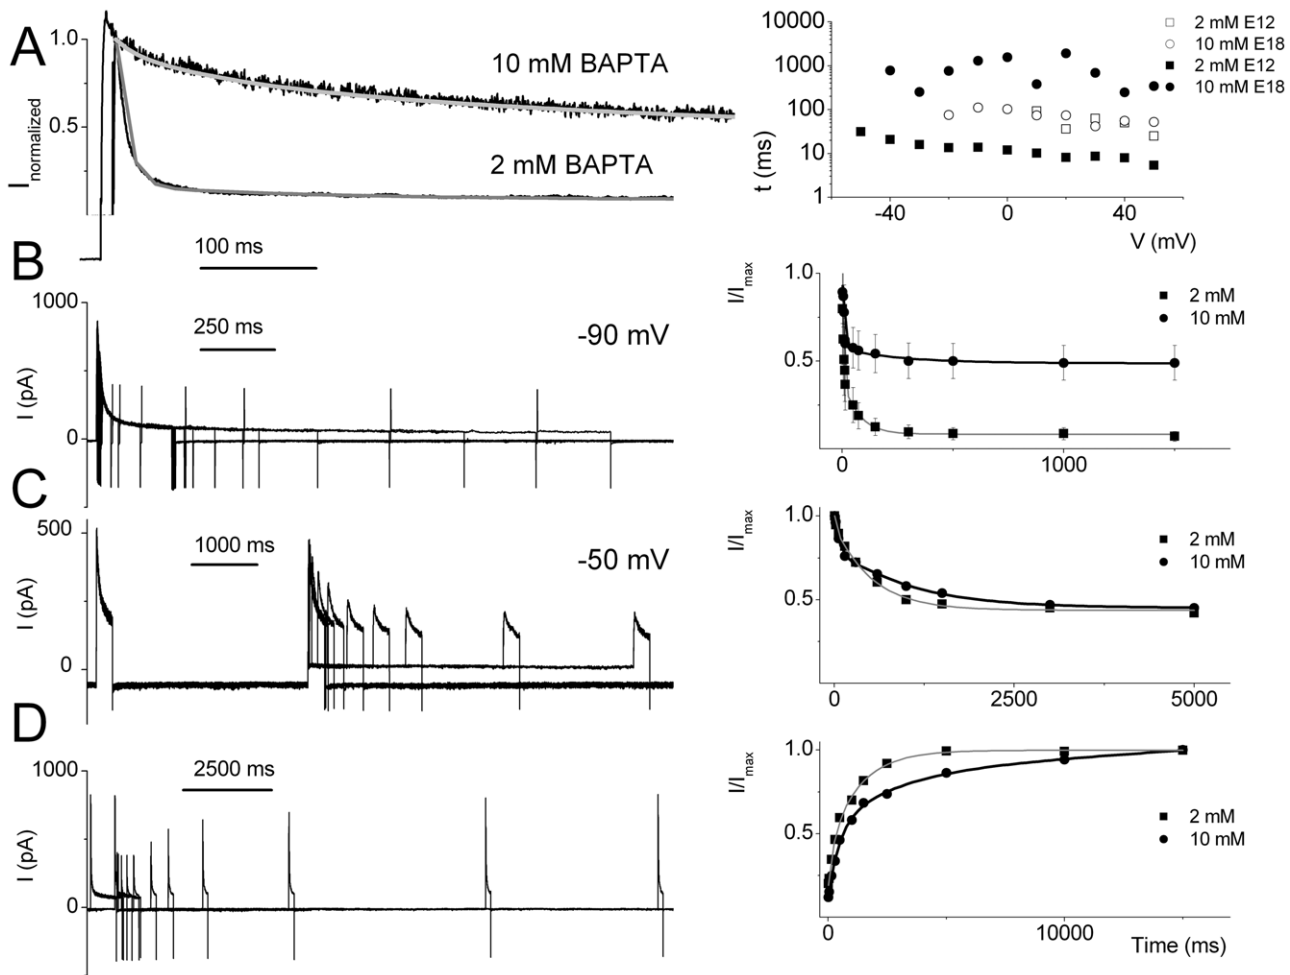

**Figure 9. Kinetics of inactivation of  $I_A$  in the developing HCs is affected by  $Ca^{2+}_i$  availability.** (A) Normalized current traces elicited using  $\sim 1$  s pulse for E12 cells using 2 mM (dark gray line) and 10 mM BAPTA (light gray line) in the pipette (Left). The fast components of decay were eliminated with increased BAPTA as well as with maturation. Holding potential was  $-90$  mV and voltage steps were in 10 mV increments. Current decay could be best fitted with two different time constants ( $\tau$ ) at all stages of development. The time constants were prolonged with an increase in intracellular BAPTA as well as with maturation [ $\tau$ s (in ms) for E12, using 2 mM BAPTA were:  $5 \pm 3$ , and  $75 \pm 13$  ( $n = 11$  cells);  $\tau$ s for 10 mM BAPTA were  $67 \pm 3$ , and  $498 \pm 13$  ( $n = 10$  cells) and for E18:  $52 \pm 13$ , and  $611 \pm 25$  ( $n = 7$  cells)]. For the example shown at E12, the exponential fits yielded  $\tau_1 = 5$  ms and  $\tau_2 = 70$  ms for 2 mM BAPTA. The current traces illustrated from the E18 HCs were fitted with  $\tau_1 = 50$  ms and  $\tau_2 = 600$  ms. See Table 4 of summary data. (B) The time course of the development of inactivation at  $-90$  mV (Left) and the  $\tau$ s of development of inactivation were determined (Right) for current traces recorded at E12 for 2 mM BAPTA and 10 mM BAPTA [ $\tau$ s for 2 BAPTA:  $5.2 \pm 2.3$ ,  $75.2 \pm 28.8$  ( $n = 8$  cells);  $\tau$  for 10 BAPTA:  $8.7 \pm 4.1$  ms;  $289 \pm 32.9$  ( $n = 8$  cells)]. (C) Examples of traces generated to examine the time course of the development of inactivation at  $-50$  mV for E12 currents. An example of such protocol on an E12 cell is shown (Left). The exponential fits to the data are shown on the right;  $\tau$ s (in ms) for E12:  $515 \pm 161$  using 2 mM BAPTA and  $997 \pm 203$  ms using 10 mM BAPTA in the pipette ( $n = 6$  cells). (D) To estimate how quickly the current recovered from inactivation, we measured recovery kinetics after 1-second at the holding potential of  $-90$  mV, using standard recovery time protocol. We measured the amplitude of the transient potassium currents by depolarizing to a fixed potential after variable time at  $-90$  mV. Amplitude of these currents was normalized to the amplitude of the currents activated from  $-90$  mV and plotted against the duration of steps to  $-90$  mV. Examples of traces generated to examine the time course of the recovery from inactivation for E12 currents (Left). The right panel shows the time course and the exponential fits [Fits in solid lines,  $\tau$ s for E12:  $446 \pm 56$  ms using 2 mM BAPTA and  $1286 \pm 78$  ms using 10 mM BAPTA in the pipette ( $n = 5$  cells)]. Amplitude of the currents was normalized to the amplitude of the currents activated from a holding potential of  $-90$  mV and plotted against the duration of step to  $-90$  mV.  
doi:10.1371/journal.pone.0029005.g009

auxiliary subunit,  $K_v\beta 1$  that confer A-type transient current reveals multiple putative phosphorylation sites at the N- and C-termini [48] {Rajeevan, 1999 #193 [52,54]}. Indeed, several of these potential regulatory sites and the second messengers involved have been demonstrated to be  $Ca^{2+}$ -dependent. For example, there is a Src tyrosine kinase proline-rich binding site at the N-terminal of  $K_v1.5$  that confers  $Ca^{2+}$ -dependent modulation of the kinetics and voltage-dependent activation of transient  $K^+$  currents in Schwann cells [55,56]. Alternatively, it is conceivable that the presences of multiple

potential  $Ca^{2+}$ -dependent regulatory sites at the C-terminus of the channel and other interacting partners that form the channel complex could affect the localization, expression and specific functional properties of the native  $K^+$  conductance, as observed in cardiac myocytes and neurons [57–63].

$Ca^{2+}$  handling in the developing chicken basilar papilla may undergo marked plasticity to account for varying demands for the expression of  $Ca^{2+}$ -dependent processes and increased  $Ca^{2+}$  influx through increased transduction channel numbers [64]. For

example the expression of the mobile  $\text{Ca}^{2+}$  buffer, calbindin, is regulated during development and along the tonotopic axis of the cochlear in accordance with the demands of  $\text{Ca}^{2+}$  regulation [64]. Similar assortments of  $\text{Ca}^{2+}$  regulation can be seen in the apico-basal gradient of the basilar papilla [65]. The differential and increased expression of  $\text{Ca}^{2+}$  buffers during development dovetails well with the expression pattern of  $\text{Ca}^{2+}$  buffers [64]. In keeping with the expression pattern of  $\text{Ca}^{2+}$  buffers in HCs of the developing basilar papilla and our findings, the kinetics and voltage-dependence of  $I_A$  are expected to be altered. Voltage dependence of the activation and inactivation of  $I_A$  are shifted to more positive potentials with increased  $\text{Ca}^{2+}$  buffers. Throughout development, basal HCs express  $I_A$  of faster kinetics of inactivation than at the apical aspects of the basilar papilla. Moreover, with maturation this difference is magnified as apical HCs lose the transient component of  $\text{K}^+$  currents. At the basal aspects, the ratio of  $I_A$  to the total outward  $\text{K}^+$  current is diminished with maturation. Whereas these findings are in accordance with

changes in  $\text{Ca}^{2+}$  handling in the chicken basilar papilla, they are in stark contrast to reports on the expression of 4-AP sensitive current, presumably  $I_A$ , in the developing mouse HC, where the expression of the current increases with development and persists in mature HCs [16,66]. Together, our data demonstrates that reduction of  $\text{Ca}^{2+}$  availability has profound effects not only on the kinetics of  $I_A$  and the number of channels expressed in HCs, but also on the ensuing SAP, which is sculpted by the current.

## Acknowledgments

We thank Dr. N. Chiamvimonvat and members of our laboratory for their comments on the initial draft of the manuscript.

## Author Contributions

Conceived and designed the experiments: SL PL ENY. Performed the experiments: SL PL. Analyzed the data: SL PL ENY. Contributed reagents/materials/analysis tools: ENY. Wrote the paper: SL ENY.

## References

- Zhang LI, Poo M-m (2001) Electrical activity and development of neural circuits. *Nat Neurosci*.
- Moody WJ, Bosma MM (2005) Ion channel development, spontaneous activity, and activity-dependent development in nerve and muscle cells. *Physiol Rev* 85: 883–941.
- Katz LC, Shatz CJ (1996) Synaptic activity and the construction of cortical circuits. *Science* 274: 1133–1138.
- Blankenship AG, Feller MB (2010) Mechanisms underlying spontaneous patterned activity in developing neural circuits. *Nat Rev Neurosci* 11: 18–29.
- Abitbol I, Peretz A, Lerche C, Busch AE, Attali B (1999) Stilbenes and fenamates rescue the loss of I(KS) channel function induced by an LQT5 mutation and other IsK mutants. *EMBO J* 18: 4137–4148.
- Worley PF, Bhat RV, Baraban JM, Erickson CA, McNaughton BL, et al. (1993) Thresholds for synaptic activation of transcription factors in hippocampus: correlation with long-term enhancement. *J Neurosci* 13: 4776–4786.
- Fields RD, Itoh K (1996) Neural cell adhesion molecules in activity-dependent development and synaptic plasticity. *Trends Neurosci* 19: 473–480.
- Johnson SL, Adelman JP, Marcotti W (2007) Genetic deletion of SK2 channels in mouse inner hair cells prevents the developmental linearization in the  $\text{Ca}^{2+}$  dependence of exocytosis. *The Journal of Physiology* 583: 631–646.
- Levic S, Nie L, Tuteja D, Harvey M, Sokolowski BH, et al. (2007) Development and regeneration of hair cells share common functional features. *Proc Natl Acad Sci U S A* 104: 19108–19113.
- Kros CJ, Ruppersberg JP, Rüscher A (1998) Expression of a potassium current in inner hair cells during development of hearing in mice. *Nature* 394: 281–284.
- Beutner D, Moser T (2001) The Presynaptic Function of Mouse Cochlear Inner Hair Cells during Development of Hearing. *The Journal of Neuroscience* 21: 4593–4599.
- Glowatzki E, Fuchs PA (2002) Transmitter release at the hair cell ribbon synapse. *Nat Neurosci* 5: 147–154.
- Marcotti W, Johnson SL, Rüscher A, Kros CJ (2003) Sodium and calcium currents shape action potentials in immature mouse inner hair cells. *J Physiol* 552: 743–761.
- Brandt N, Kuhn S, Münkner S, Braig C, Winter H, et al. (2007) Thyroid Hormone Deficiency Affects Postnatal Spiking Activity and Expression of  $\text{Ca}^{2+}$  and  $\text{K}^+$  Channels in Rodent Inner Hair Cells. *The Journal of Neuroscience* 27: 3174–3186.
- Born DE, Rubel EW (1985) Afferent influences on brain stem auditory nuclei of the chicken: neuron number and size following cochlea removal. *J Comp Neurol* 231: 435–445.
- Marcotti W, Johnson SL, Holley MC, Kros CJ (2003) Developmental changes in the expression of potassium currents of embryonic, neonatal and mature mouse inner hair cells. *J Physiol* 548: 383–400.
- Saunders JC, Adler HJ, Cohen YE, Smullen S, Kazahaya K (1998) Morphometric changes in the chick nucleus magnocellularis following acoustic overstimulation. *J Comp Neurol* 390: 412–426.
- Jones TA, Jones SM, Pagggett KC (2001) Primordial Rhythmic Bursting in Embryonic Cochlear Ganglion Cells. *The Journal of Neuroscience* 21: 8129–8135.
- Jones TA, Jones SM, Pagggett KC (2006) Emergence of Hearing in the Chicken Embryo. *J Neurophysiol* 96: 128–141.
- Lippe WR (1994) Rhythmic spontaneous activity in the developing avian auditory system. *J Neurosci* 14: 1486–1495.
- Johnson SL, Eckrich T, Kuhn S, Zampini V, Franz C, et al. (2011) Position-dependent patterning of spontaneous action potentials in immature cochlear inner hair cells. *Nat Neurosci* 14: 711–717.
- Kandler K, Clause A, Noh J (2009) Tonotopic reorganization of developing auditory brainstem circuits. *Nat Neurosci* 12: 711–717.
- Tritsch NX, Rodriguez-Contreras A, Crins TTH, Wang HC, Borst JGG, et al. (2010) Calcium action potentials in hair cells pattern auditory neuron activity before hearing onset. *Nat Neurosci* 13: 1050–1052.
- Kennedy HJ, Meech RW (2002) Fast  $\text{Ca}^{2+}$  signals at mouse inner hair cell synapse: a role for  $\text{Ca}^{2+}$ -induced  $\text{Ca}^{2+}$  release. *J Physiol* 539: 15–23.
- Tritsch NX, Bergles DE (2010) Developmental Regulation of Spontaneous Activity in the Mammalian Cochlea. *The Journal of Neuroscience* 30: 1539–1550.
- Alladi PA, Roy T, Singh N, Wadhwa S (2005) Developmentally regulated expression of c-Fos and c-Jun in the brainstem auditory nuclei of *Gallus domesticus* is modified by prenatal auditory enrichment. *J Neurobiol* 62: 92–105.
- Alladi PA, Roy T, Singh N, Wadhwa S (2005) Prenatal auditory enrichment with species-specific calls and sitar music modulates expression of *Bcl-2* and *Bax* to alter programmed cell death in developing chick auditory nuclei. *Int J Dev Neurosci* 23: 363–373.
- Greenberg ME, Ziff EB, Greene LA (1986) Stimulation of neuronal acetylcholine receptors induces rapid gene transcription. *Science* 234: 80–83.
- Spitzer NC (2002) Activity-dependent neuronal differentiation prior to synapse formation: the functions of calcium transients. *J Physiol Paris* 96: 73–80.
- West AE, Chen WG, Dalva MB, Dolmetsch RE, Kornhauser JM, et al. (2001) Calcium regulation of neuronal gene expression. *Proc Natl Acad Sci U S A* 98: 11024–11031.
- Baxter DA, Byrne JH (1991) Ionic conductance mechanisms contributing to the electrophysiological properties of neurons. *Curr Opin Neurobiol* 1: 105–112.
- Connor JA, Stevens CF (1971) Voltage clamp studies of a transient outward membrane current in gastropod neural somata. *J Physiol* 213: 21–30.
- Llinas RR (1988) The intrinsic electrophysiological properties of mammalian neurons: insights into central nervous system function. *Science* 242: 1654–1664.
- Wang L, Duff HJ (1997) Developmental changes in transient outward current in mouse ventricle. *Circ Res* 81: 120–127.
- Dukes ID, Morad M (1991) The transient  $\text{K}^+$  current in rat ventricular myocytes: evaluation of its  $\text{Ca}^{2+}$  and  $\text{Na}^+$  dependence. *J Physiol* 435: 395–420.
- Park SY, Choi JY, Kim RU, Lee YS, Cho HJ, et al. (2003) Downregulation of voltage-gated potassium channel alpha gene expression by axotomy and neurotrophins in rat dorsal root ganglia. *Mol Cells* 16: 256–259.
- Perrier E, Perrier R, Richard S, Benitah JP (2004)  $\text{Ca}^{2+}$  controls functional expression of the cardiac  $\text{K}^+$  transient outward current via the calcineurin pathway. *J Biol Chem* 279: 40634–40639.
- Schrader LA, Ren Y, Cheng F, Bui D, Sweatt JD, et al. (2009) *Kv4.2* is a locus for PKC and ERK/MAPK cross-talk. *Biochem J* 417: 705–715.
- Varga AW, Yuan LL, Anderson AE, Schrader LA, Wu GY, et al. (2004) Calcium-calmodulin-dependent kinase II modulates *Kv4.2* channel expression and upregulates neuronal A-type potassium currents. *J Neurosci* 24: 3643–3654.
- Dupont G, Dumollard R (2004) Simulation of calcium waves in ascidian eggs: insights into the origin of the pacemaker sites and the possible nature of the sperm factor. *J Cell Sci* 117: 4313–4323.
- Hofer T, Venance L, Giaume C (2002) Control and plasticity of intercellular calcium waves in astrocytes: a modeling approach. *J Neurosci* 22: 4850–4859.
- Venance L, Stella N, Glowinski J, Giaume C (1997) Mechanism involved in initiation and propagation of receptor-induced intercellular calcium signaling in cultured rat astrocytes. *J Neurosci* 17: 1981–1992.
- Wagner J, Fall CP, Hong F, Sims CE, Allbritton NL, et al. (2004) A wave of IP3 production accompanies the fertilization  $\text{Ca}^{2+}$  wave in the egg of the frog,

- Xenopus laevis: theoretical and experimental support. *Cell Calcium* 35: 433–447.
44. Hamburger V, Hamilton HL (1992) A series of normal stages in the development of the chick embryo. 1951. *Dev Dyn* 195: 231–272.
  45. Neher E (1992) Correction for liquid junction potentials in patch clamp experiments. *Methods Enzymol* 207: 123–131.
  46. Marcotti W, Johnson SL, Kros CJ (2004) Effects of intracellular stores and extracellular Ca(2+) on Ca(2+)-activated K(+) currents in mature mouse inner hair cells. *J Physiol* 557: 613–633.
  47. Moser T, Brandt A, Lysakowski A (2006) Hair cell ribbon synapses. *Cell Tissue Res* 326: 347–359.
  48. Duzhy DE, Sakai Y, Sokolowski BH (2004) Cloning and developmental expression of Shaker potassium channels in the cochlea of the chicken. *Brain Res Mol Brain Res* 121: 70–85.
  49. Rajeevan MS, Hu S, Sakai Y, Sokolowski BH (1999) Cloning and expression of Shaker alpha- and beta-subunits during inner ear development. *Brain Res Mol Brain Res* 66: 83–93.
  50. Fuchs PA, Evans MG (1990) Potassium currents in hair cells isolated from the cochlea of the chick. *J Physiol* 429: 529–551.
  51. Murrow BW (1994) Position-dependent expression of potassium currents by chick cochlear hair cells. *J Physiol* 480(Pt 2): 247–259.
  52. Sokolowski BH, Sakai Y, Harvey MC, Duzhy DE (2004) Identification and localization of an arachidonic acid-sensitive potassium channel in the cochlea. *J Neurosci* 24: 6265–6276.
  53. Griguer C, Fuchs PA (1996) Voltage-dependent potassium currents in cochlear hair cells of the embryonic chick. *J Neurophysiol* 75: 508–513.
  54. Sewing S, Roeper J, Pongs O (1996) Kv beta 1 subunit binding specific for shaker-related potassium channel alpha subunits. *Neuron* 16: 455–463.
  55. Peretz A, Sobko A, Attali B (1999) Tyrosine kinases modulate K+ channel gating in mouse Schwann cells. *J Physiol* 519 Pt 2: 373–384.
  56. Holmes TC, Fadool DA, Ren R, Levitan IB (1996) Association of Src tyrosine kinase with a human potassium channel mediated by SH3 domain. *Science* 274: 2089–2091.
  57. Birnbaum SG, Varga AW, Yuan LL, Anderson AE, Sweatt JD, et al. (2004) Structure and function of Kv4-family transient potassium channels. *Physiol Rev* 84: 803–833.
  58. An WF, Bowlby MR, Betty M, Cao J, Ling HP, et al. (2000) Modulation of A-type potassium channels by a family of calcium sensors. *Nature* 403: 553–556.
  59. Suko J, Maurer-Fogy I, Plank B, Bertel O, Wyskovsky W, et al. (1993) Phosphorylation of serine 2843 in ryanodine receptor-calcium release channel of skeletal muscle by cAMP-, cGMP- and CaM-dependent protein kinase. *Biochim Biophys Acta* 1175: 193–206.
  60. Jahn H, Nastainczyk W, Rohrkasten A, Schneider T, Hofmann F (1988) Site-specific phosphorylation of the purified receptor for calcium-channel blockers by cAMP- and cGMP-dependent protein kinases, protein kinase C, calmodulin-dependent protein kinase II and casein kinase II. *Eur J Biochem* 178: 535–542.
  61. Cai SQ, Li W, Sesti F (2007) Multiple modes of a-type potassium current regulation. *Curr Pharm Des* 13: 3178–3184.
  62. Harootunian AT, Kao JP, Paranjape S, Tsien RY (1991) Generation of calcium oscillations in fibroblasts by positive feedback between calcium and IP3. *Science* 251: 75–78.
  63. Rebecchi MJ, Pentyala SN (2000) Structure, function, and control of phosphoinositide-specific phospholipase C. *Physiol Rev* 80: 1291–1335.
  64. Hiel H, Navaratnam DS, Oberholtzer JC, Fuchs PA (2002) Topological and developmental gradients of calbindin expression in the chick's inner ear. *J Assoc Res Otolaryngol* 3: 1–15.
  65. Ricci AJ, Fettiplace R (1997) The effects of calcium buffering and cyclic AMP on mechano-electrical transduction in turtle auditory hair cells. *J Physiol* 501(Pt 1): 111–124.
  66. Housley GD, Marcotti W, Navaratnam D, Yamoah EN (2006) Hair cells—beyond the transducer. *J Membr Biol* 209: 89–118.
